# Supplementary material for: A new method to quantify penile erection hardness: real-time ultrasonic shear wave elastography
Source: PubMed Central journal article supplement — Transl Androl Urol. 2020 Aug;9(4):1735–42. doi: 10.21037/tau-20-1096 (PMC7475665; doi:10.21037/tau-20-1096), 2020-08
Supplement: tau-09-04-1735-dss.pdf [file tau-09-04-1735-dss.pdf]

## Data Sharing Statement

|                     |                                                                                                                                                     |                                                                                                                  |
|---------------------|-----------------------------------------------------------------------------------------------------------------------------------------------------|------------------------------------------------------------------------------------------------------------------|
| <b>Article Info</b> | <a href="http://dx.doi.org/10.21037/tau-20-1096">http://dx.doi.org/10.21037/tau-20-1096</a>                                                         |                                                                                                                  |
| <b>Item</b>         | <b>Question</b>                                                                                                                                     | <b>Authors' Response<br/>(place "-" if not applicable)</b>                                                       |
| 1                   | Would you like to share data collected for your study to others?                                                                                    | Yes.                                                                                                             |
| 2                   | If not, would you like to share the reason for your decision?                                                                                       |                                                                                                                  |
| 3                   | What data in particular will be shared?                                                                                                             | Data, images                                                                                                     |
| 4                   | Any other documents will be shared? Such as study protocol, statistical analysis plan, informed consent form, clinical study report, analytic code. | Statistical analysis plan, informed consent form, and clinical study report will also be shared if requested.    |
| 5                   | When will data availability begin?                                                                                                                  | From the publication date.                                                                                       |
| 6                   | When will data availability end?<br>这些数据什么时间结束共享?                                                                                                   | Forever.                                                                                                         |
| 7                   | To whom will you share the data?                                                                                                                    | All readers.                                                                                                     |
| 8                   | For what type of analysis or purpose?                                                                                                               | Study in the ED.                                                                                                 |
| 9                   | How or where can the data/documents be obtained?                                                                                                    | Email: ruanlitao@163.com                                                                                         |
| 10                  | Any other restrictions?                                                                                                                             | We may balance the potential benefits and risks for each request and then provide the data that could be shared. |
